# Supplementary material for: Investigation of CsPbBr3 CVD dynamics at various temperatures
Source: Royal Society of Chemistry journal article supplement (doi:10.1039/d1cp03794c), 2021-01-01
Supplement: d1cp03794c1.pdf [file d1cp03794c1.pdf]

## Supplementary Information

**Title:** “Investigation of CsPbBr<sub>3</sub> CVD dynamic at different temperatures”

Authors: Chenyang Bao, Xiang Peng, Leiying Ying, Yang Mei, Baoping Zhang and Hao Long\*.

\*Corresponding emails: [longhao@xmu.edu.cn](mailto:longhao@xmu.edu.cn)

### 1. XPS results:

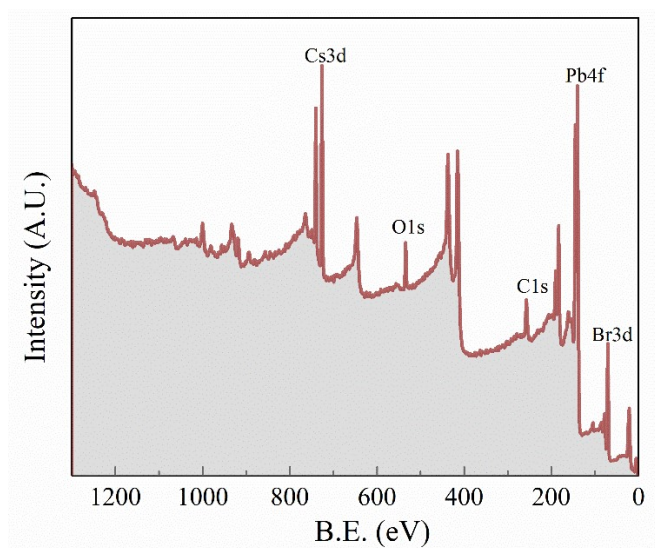

Fig.S1: XPS of CsPbBr<sub>3</sub> deposited at 250°C.

| Element | B.E.(eV) | Area  | Measured Atomic Percentage | Excepted Atomic Percentage |
|---------|----------|-------|----------------------------|----------------------------|
| Cs      | 725.28   | 69582 | 18.33                      | 20.00                      |
| Pb      | 139.19   | 73075 | 24.07                      | 20.00                      |
| Br      | 69.00    | 14421 | 57.60                      | 60.00                      |

Table S1: Analyzation of XPS data.

### 2. Crystalline size, dislocation density and strain of perovskite by XRD

According to the literature[1-3],  $2\theta$  angle and width of powder XRD curves  $\beta$  were analyzed to investigate the average crystalline size  $D$ , dislocation density  $\rho$  and strain  $\epsilon$ . Average crystalline size  $D$  was calculated by Debye Scherrer's Equation:

$$D = \frac{0.9\lambda}{\beta \cos^2(\theta)} \quad (1)$$

where  $\lambda$  is the X-ray wavelength (0.154 nm).

Dislocation density and strain were calculated by:

$$\rho = 1/D^2 \quad (2)$$

$$\varepsilon = \beta/4\tan \theta \quad (3).$$

Results were shown in Table S2:

Table S2 : Parameter calculated from XRD curves

| Temperature (°C) | D(nm) | $\rho(\mu\text{m}^{-1})$ | $\varepsilon$ (%) | Notes                                      |
|------------------|-------|--------------------------|-------------------|--------------------------------------------|
| 30               | 63.2  | 250.3                    | 0.29              |                                            |
| 100              | 70.4  | 202.0                    | 0.26              |                                            |
| 150              | 48.4  | 426.1                    | 0.38              |                                            |
| 200              | 82.1  | 148.2                    | 0.22              | ✓ Best quality<br>✓ Decent deposition rate |
| 250              | 50.9  | 385.1                    | 0.35              | Highest deposition rate                    |
| 300              | 46.4  | 462.5                    | 0.39              |                                            |

From Table S2 and Fig.4, the perovskite thin film deposited at 200 °C appeared lowest dislocation density and decent deposition rate.

### 3. Reactant concentration in chamber:

To calculate the reactant concentration in chamber ( $n^c$ ), we assumed that the solid CsBr and PbBr<sub>2</sub> powders were firstly melted (actually we indeed observed the melted and recrystallized CsBr and PbBr<sub>2</sub> in reactant crucible after CVD growth). There is an equilibrium between gas/liquid phase at the interface between melted powder and chamber gas. The gas/solid phase equilibrium line (P-T) could be expressed:

$$\ln P_c/P_1 = \frac{\Delta_{vap}H_m}{R} \left( \frac{1}{T_1} - \frac{1}{T_c} \right) \quad (4);$$

where  $\Delta_{vap}H_m$ , R were the molar vaporization enthalpy and molar gas constant;  $P_c$ ,  $T_c$  were saturated vapor pressure and temperature in chamber. ( $P_1$ ,  $T_1$ ) were any known vaporization point on phase equilibrium line. According to Langes Chemistry Handbook[4], when  $P_1$  is one bar, the vaporization temperature  $T_1$  of CsBr and PbBr<sub>2</sub> are 1300°C and 914°C,

respectively. As  $T_c=500^\circ\text{C}$  was set to heat reactant powders in first furnace, the saturated vapor pressure  $P_c$  could be derived as:  $P_c=118$  Torr of  $\text{CsBr}$  and  $243$  Torr of  $\text{PbBr}_2$ .

With the saturated vapor pressure  $P_c$ , the reactant concentration in chamber ( $n^c = N/V$ ) could be calculated by:

$$n^c = N/V = P_c/RT \quad (5).$$

In our calculation,  $n_{\text{CsBr}}^c = 2.4 \text{ mol/m}^3$  and  $n_{\text{PbBr}_2}^c = 5.05 \text{ mol/m}^3$  were derived.

#### 4. Diffusion coefficient (D):

The diffusion coefficient represented the capability of single molecular diffusing to target:

$$D = \frac{1}{3} \bar{v} l \quad (6)$$

where  $\bar{v}$ ,  $l$  were mean velocity and diffusion length of reactant. In this study, the mean velocity was estimated by thermal motion:

$$\bar{v} = \sqrt{\frac{3k_B T}{m}} \quad (7).$$

The mean diffusion length was estimated by:

$$l \approx \frac{1}{n^c d^2} \quad (8),$$

where  $d$  is the diameter of reactant molecules. Therefore, the diffusion coefficients  $D$  were

calculated to be:  $3.95 \text{ cm}^2/\text{s}$  of  $\text{CsBr}$  and  $0.4 \text{ cm}^2/\text{s}$  of  $\text{PbBr}_2$ . It shows that the diffusion ability of  $\text{PbBr}_2$  was pretty weaker than  $\text{CsBr}$ .

#### 5. Diffusion layer thickness $\delta$

The conception of diffusion layer thickness comes from laminar flow of fluid mechanics.

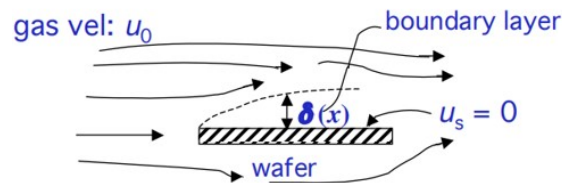

Fig.S2: diagram of gas flow through substrate surface.

As shown in Fig.S2, when reactant gas flow through substrate, a boundary layer formed on the wafer surface with no velocity. Reactant diffuses through this boundary layer into substrate. The average diffusion layer thickness could be calculated by:

$$\delta = \frac{1}{L} \int_0^L \sqrt{\frac{\eta x}{\rho u_0}} dx = \frac{2}{3} L \sqrt{\frac{\eta}{\rho u_0 L}} \quad (9);$$

where  $L$  is the substrate length of 2cm;  $\eta$  was the coefficient of viscosity;  $\rho$  was the density;  $u_0$  was the gas velocity, which was estimated to be 0.38m/s by vacuum pump's pumping speed (3L/s).  $\eta$  was calculated based on Sutherland's theorem:

$$\eta = \eta_0 \left(\frac{T}{T_c}\right)^{1.5} \frac{T_c + T_s}{T + T_s} \quad (10)$$

As we know  $\eta_0 = 16.6 \times 10^{-6}$ ,  $T_c = 273K$  and  $T_s = 104K$  of nitrogen ( $N_2$ ) carrier, the  $\eta$  could be derived at different substrate temperature  $T$ .

With all above  $n^c$ ,  $\delta$  and  $D$  ready, the inflow of reactants could then be readily calculated:

$$I = D/\delta \cdot (n^c - n^{sub}) \quad (11)$$

#### 6. *Vibration frequency $f(T,m)$ in desorption coefficient $\alpha$ :*

In this work, we utilized Lindemann criterion[5] (molecules desorbed from substrate when their displacement exceeding 1/10 lattice distance) to estimate the frequency  $f(T,m)$ :

$$f(T,m) = \frac{v}{0.1d} = \frac{\sqrt{2k_B T/m}}{0.1d} \quad (12).$$

The velocity  $v$  was estimated by thermal motion of molecular.

#### **References:**

- [1]. A.Goktas, A.Tumbul, Z.Aba, A.Kilic, and F.Aslan; Enhancing crystalline/optical quality, and photoluminescence properties of the Na and Sn substituted ZnS thin films for optoelectronic and solar cell applications; a comparative study; Optical Materials 107 (2020) 110073.
- [2]. A.Tumbul, F.Aslan, A.Goktas, M.Z.Zarbali and A.Kilic; Highly stable ethanol-based Cu<sub>2</sub>ZnSnS<sub>4</sub> (CZTS) low-cost thin film absorber: Effect of solution aging; Materials Chemistry and Physics 258 (2021) 123997.
- [3]. F.Aslan, G.Adam, P.Stadler, A.Goktas, I.H.Mutlu, and N.S.Sariciftci; Sol-gel derived In<sub>2</sub>S<sub>3</sub> buffer layers for inverted organic photovoltaic cells; Solar Energy 108 (2014) 230–237.
- [4]. J.A.Dean, J.F.Shang, S.J.Chao, W.M.Xin, et.al.; Langes Chemistry Handbook 13<sup>th</sup> Edition; Science Press; 1991.
- [5]. S.Rabinovich, A.Voronel, and L.Peretzman; Generalization of the lindemann criterion for disordered mixed crystals; J.Phys.C-solid state physics; 21,35,5943-5952;1988
